# Supplementary material for: Flavonoid constituents ofAmomum tsao-koCrevost et Lemarie and their antioxidant and antidiabetic effects in diabetic rats –in vitroandin vivostudies
Source: Royal Society of Chemistry journal article supplement (doi:10.1039/d1fo02974f), 2021-12-03
Supplement: d1fo02974f1.pdf [file d1fo02974f1.pdf]

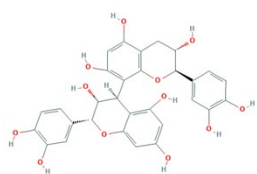

1 Procyanidin B1

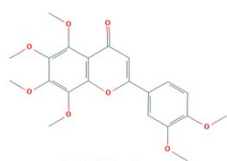

2 Nobiletin

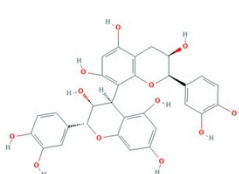

3 Procyanidin B2

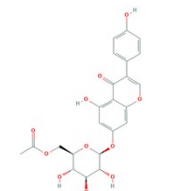

4 6'-O-Acetylgustin

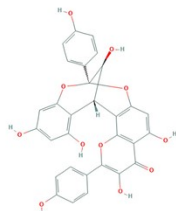

5 Ephedrannin A

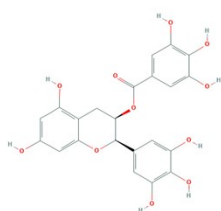

6 Epigallocatechin 3-gallate

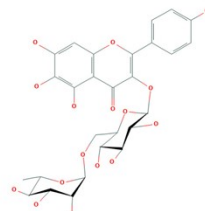

7 6-Hydroxykaempferol 3-β-rutinoside

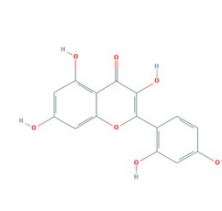

8 Morin

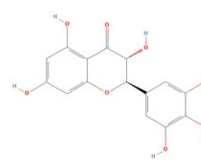

9 Dihydromyricetin

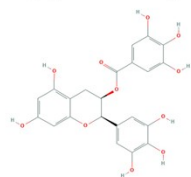

10 Liquiritigenin

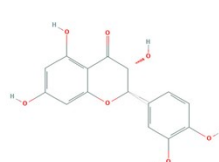

11 Taxifolin

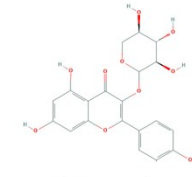

12 Reynoutrin

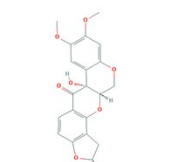

13 12a-Hydroxyrotenone

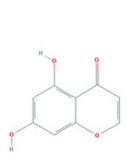

14 5,7-Dihydroxychromone

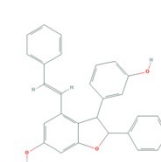

15 3-(3-hydroxyphenyl)-2-phenyl-4-[(E)-2-phenylethenyl]-2,3-dihydro-1-benzofuran-6-ol

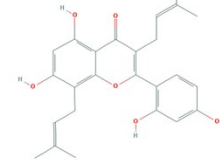

16 Mulberrin

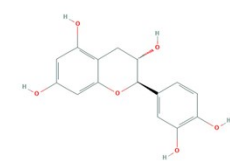

17 (+)-Catechin

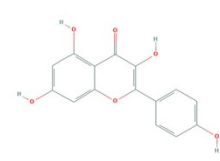

18 Kaempferol

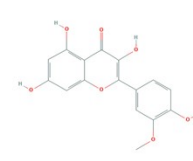

19 Isorhamnetin

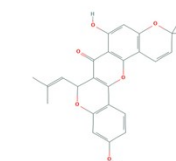

20 Cyclomorusin

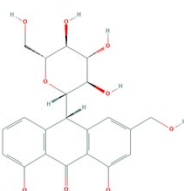

21 Barbaloin

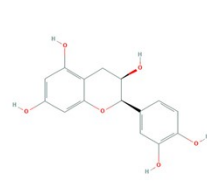

22 (-)-Epicatechin

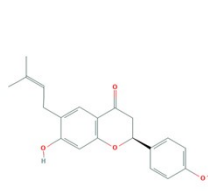

23 Bavachin

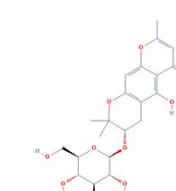

24 sec-O-Glucosylhamaudol

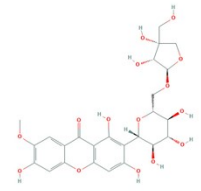

25 Polygalaxanthone III

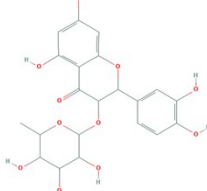

26 Isoastilbin

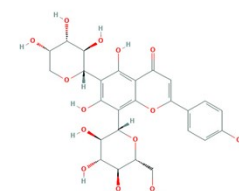

27 Isoschaftoside

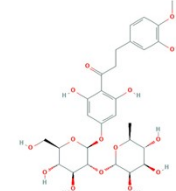

28 Neohesperidin dihydrochalcone

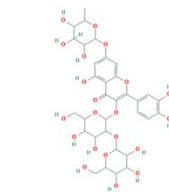

29 Quercetin 3-O-sophoroside-7-O-rhamnoside

**Supplemental Fig. 1** Chemical structures of flavonoid compounds identified from *A. tsao-ko*.
